# Supplementary material for: Elucidating the 3D Structure of a Surface Membrane Antigen from Trypanosoma cruzi as a Serodiagnostic Biomarker of Chagas Disease
Source: MDPI journal article supplement (doi:10.3390/vaccines10010071), 2022-01-03
Supplement: s1 [file s1]

## SUPPORTING INFORMATION

# Elucidating the 3D structure of a surface membrane antigen from *Trypanosoma cruzi* as a serodiagnostic biomarker of Chagas disease.

Flavio Di Pisa <sup>1</sup>, Stefano De Benedetti <sup>1§</sup>, Enrico Mario Alessandro Fassi <sup>2,3</sup>, Mauro Bombaci <sup>4</sup>, Renata Grifantini <sup>4</sup>, Angelo Musicò <sup>2</sup>, Roberto Frigerio <sup>2</sup>, Angela Pontillo <sup>5</sup>, Cinzia Rigo <sup>6</sup>, Sandra Abelli <sup>6</sup>, Romualdo Grande <sup>7</sup>, Nadia Zanchetta <sup>7</sup>, Davide Mileto <sup>7</sup>, Alessandro Mancon <sup>7</sup>, Alberto Rizzo <sup>7</sup>, Alessandro Gori <sup>2</sup>, Marina Cretich <sup>2</sup>, Giorgio Colombo <sup>2,8</sup>, Martino Bolognesi <sup>1,9</sup>, Louise Jane Gourlay <sup>\*1</sup>.

## TcSMP Expression and purification – supporting figures

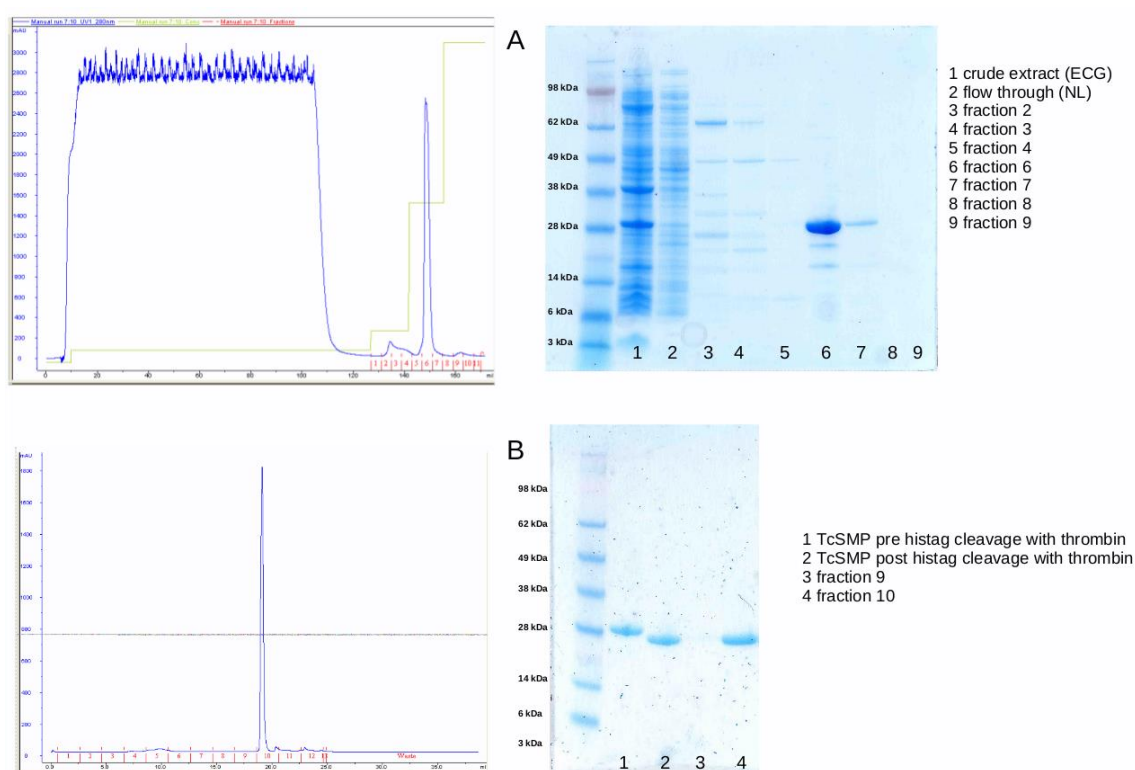

**Figure S1.** A) Akta FLPC chromatographic profile of His-trap (first step) purification and SDS-PAGE analysis of TcSMP B) Size exclusion chromatography profile of TcSMP (second step) and SDS-PAGE analysis.

## 3D Structure of TcSMP

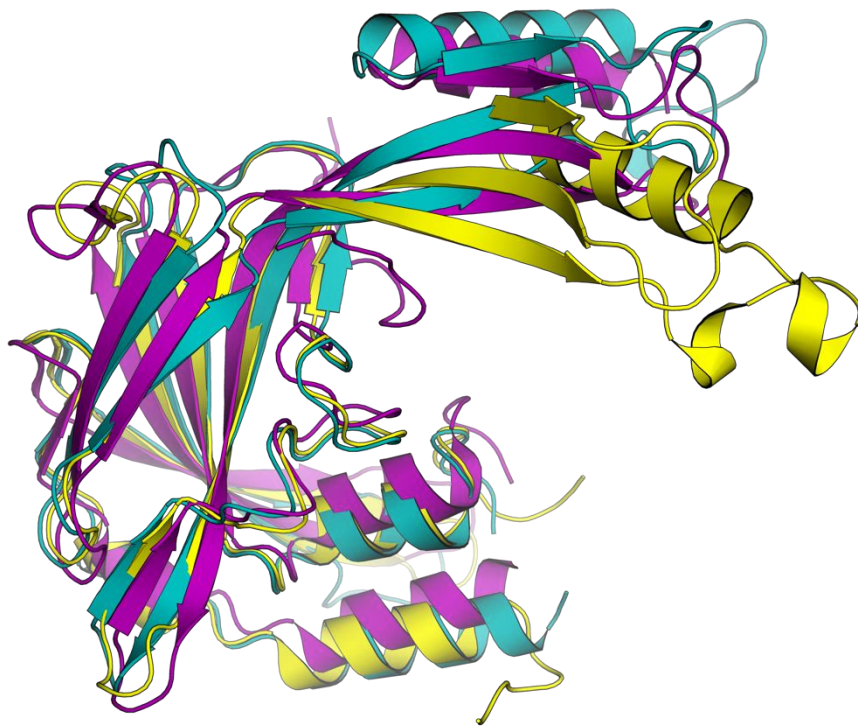

**Figure S2. Structural superposition of TcSMP with its two homologs:** *T. brucei* procyclic-specific surface antigen-2 (pdb code 5KLH, yellow) and *T. congolense* insect stage antigen (pdb code 5KMX, purple) were superimposed on the TcSMP crystal structure (teal). This image was generated using CCP4mg.

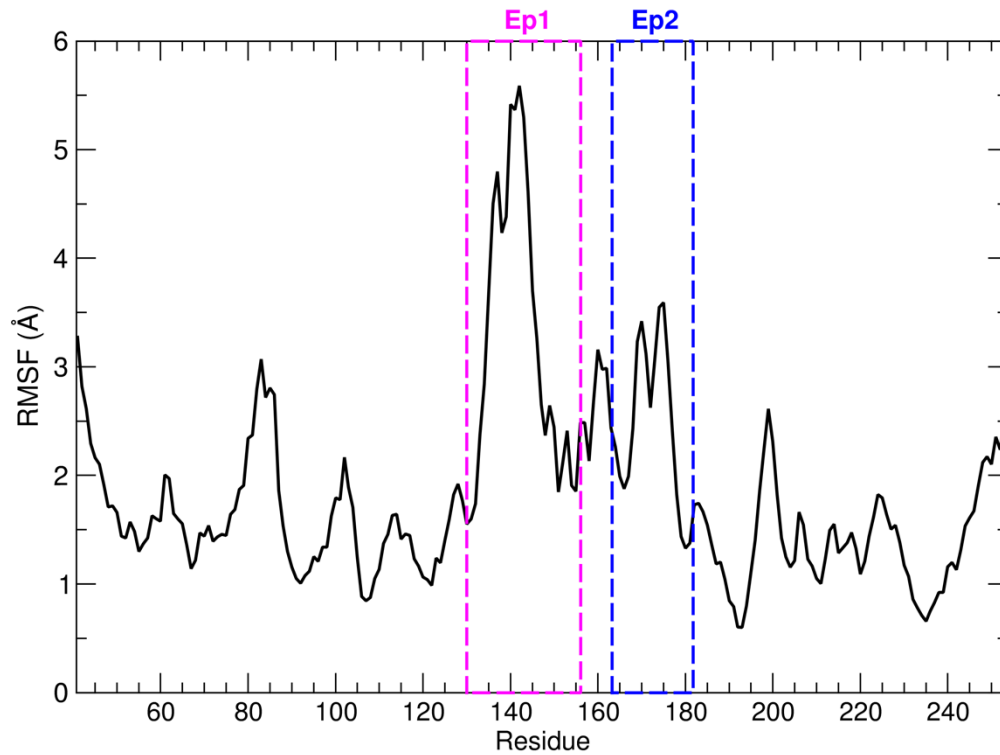

**Figure S3.** Root Mean Square Fluctuation (RMSF) of TcSMP (3x500ns MD simulations). The predicted epitopes are showed in magenta and blue broken lines for Ep1 and Ep2, respectively.

#### X-ray data collection and refinement statistics

**Table S1.** X-ray diffraction data collected on a single crystal of TcSMP11.90. Values in parenthesis correspond to the high-resolution shell. For cross-validation, 5% experimental reflections were randomly selected to calculate the  $R_{\text{free}}$  value.

| TcSMP11.90<br>(PDB code 6Y0D)                        |                                |
|------------------------------------------------------|--------------------------------|
| <b>Crystal</b>                                       |                                |
| Space group                                          | C 1 2 1                        |
| Cell dimensions $a$ , $b$ , $c$<br>(Å) ; $\beta$ (°) | 95.89, 33.192, 67.445; 108.059 |
| <b>Data collection</b>                               |                                |
| Beamline                                             | DLS I04                        |
| Wavelength (Å)                                       | 0.9795                         |
| Resolution (Å)                                       | 64.12-1.62 (1.71-1.62)         |
| Total reflections                                    | 161403 (17485)                 |
| Unique reflections                                   | 26050 (3749)                   |
| $R_{\text{merge}}$                                   | 0.059 (0.984)                  |
| $^{\#}R_{\text{meas}}$                               | 0.065 (1.111)                  |
| $I/\sigma(I)$                                        | 13.9 (1.5)                     |
| $^+CC_{1/2}$                                         | 0.999 (0.694)                  |

|                                     |             |
|-------------------------------------|-------------|
| Completeness (%)                    | 99.9 (99.6) |
| Redundancy                          | 6.2 (4.7)   |
| Wilson B-factor (Å <sup>2</sup> )   | 25.38       |
| <b>Refinement</b>                   |             |
| Resolution (Å)                      | 44.18-1.62  |
| No. reflections                     | 25643       |
| $R_{\text{work}} / R_{\text{free}}$ | 19.2/22.9   |
| No. atoms                           |             |
| Protein                             | 1641        |
| Water                               | 161         |
| B factors                           |             |
| Protein                             | 38.63       |
| Water                               | 38.96       |
| R.m.s. deviations                   |             |
| Bond lengths (Å)                    | 0.009       |
| Bond angles (°)                     | 0.95        |
| Clash scores                        | 2.81        |
| Ramachandran                        |             |
| Favored (%)                         | 96.7        |
| Allowed (%)                         | 3.3         |

# Redundancy-independent merging R factor  $R_{\text{meas}}$  estimated by multiplying the conventional R merge value by the factor  $[N/(N-1)]^{1/2}$ , where N is the data multiplicity.

+ CC 1/2 is the correlation coefficient of the mean intensities between two random half-sets of data.

### Protein structure comparison

[Dali server](#). Matches against all PDB structures (here reported the first 20, query submitted on 04/06/2021).

|                       |        |      |      |      |      |     |           |                                                   |  |
|-----------------------|--------|------|------|------|------|-----|-----------|---------------------------------------------------|--|
| # Job: TcSMP 06042021 |        |      |      |      |      |     |           |                                                   |  |
| # Query: s001A        |        |      |      |      |      |     |           |                                                   |  |
| # No:                 | Chain  | Z    | rmsd | lali | nres | %id | PDB       | Description                                       |  |
| 1:                    | 5klh-B | 25.7 | 4.1  | 196  | 215  | 40  | MOLECULE: | SURFACE GLYCOPROTEIN;                             |  |
| 2:                    | 5kmx-A | 24.8 | 2.7  | 194  | 202  | 41  | MOLECULE: | PUTATIVE UNCHARACTERIZED PROTEIN TCIL3000_10_9440 |  |
| 3:                    | 5klh-A | 24.7 | 4.1  | 189  | 221  | 39  | MOLECULE: | SURFACE GLYCOPROTEIN;                             |  |
| 4:                    | 5kmx-B | 22.4 | 3.8  | 176  | 196  | 41  | MOLECULE: | PUTATIVE UNCHARACTERIZED PROTEIN TCIL3000_10_9440 |  |
| 5:                    | 5kmx-D | 20.8 | 4.1  | 162  | 184  | 44  | MOLECULE: | PUTATIVE UNCHARACTERIZED PROTEIN TCIL3000_10_9440 |  |
| 6:                    | 5kmx-C | 19.6 | 4.3  | 178  | 182  | 42  | MOLECULE: | PUTATIVE UNCHARACTERIZED PROTEIN TCIL3000_10_9440 |  |
| 7:                    | 5vli-C | 4.4  | 1.6  | 37   | 39   | 5   | MOLECULE: | HEMAGGLUTININ;                                    |  |
| 8:                    | 3hoi-A | 4.2  | 4.3  | 61   | 193  | 2   | MOLECULE: | FMN-DEPENDENT NITROREDUCTASE BF3017;              |  |
| 9:                    | 4yut-A | 4.0  | 3.6  | 61   | 351  | 11  | MOLECULE: | FAMILY 3 ADENYLATE CYCLASE;                       |  |
| 10:                   | 3ucq-A | 3.9  | 6.8  | 83   | 651  | 10  | MOLECULE: | AMYLOSUCRASE;                                     |  |
| 11:                   | 2gjh-A | 3.5  | 4.7  | 53   | 57   | 9   | MOLECULE: | DESIGNED PROTEIN;                                 |  |
| 12:                   | 5jg9-B | 3.5  | 2.4  | 43   | 47   | 5   | MOLECULE: | DE NOVO DESIGN, HYPER STABLE, DISULFIDE-RICH MINI |  |
| 13:                   | 4fls-A | 3.5  | 5.9  | 87   | 628  | 10  | MOLECULE: | AMYLOSUCRASE;                                     |  |
| 14:                   | 1mw3-A | 3.5  | 5.7  | 85   | 628  | 9   | MOLECULE: | AMYLOSUCRASE;                                     |  |
| 15:                   | 7jh4-A | 3.4  | 11.6 | 55   | 223  | 11  | MOLECULE: | NAD(P)H-DEPENDENT OXIDOREDUCTASE;                 |  |
| 16:                   | 4kyz-A | 3.4  | 7.0  | 72   | 167  | 11  | MOLECULE: | DESIGNED PROTEIN OR327;                           |  |
| 17:                   | 1zs2-A | 3.4  | 6.3  | 81   | 628  | 11  | MOLECULE: | AMYLOSUCRASE;                                     |  |
| 18:                   | 5mbh-A | 3.4  | 18.0 | 72   | 339  | 11  | MOLECULE: | BETA SUBUNIT OF PHOTOACTIVATED ADENYLYL CYCLASE;  |  |
| 19:                   | 5xwk-A | 3.2  | 7.2  | 89   | 530  | 9   | MOLECULE: | ALKALINE PHOSPHATASE PHOK;                        |  |
| 20:                   | 7c50-A | 3.2  | 7.6  | 79   | 192  | 4   | MOLECULE: | SIMPL DOMAIN-CONTAINING PROTEIN;                  |  |

Material and

Methods: Detailed multi-step minimization and equilibration procedure

The solvated system was relaxed by a two-step protocol to remove atomic clashes: firstly, we performed an energy minimization for 10,000 steps, or until the energy gradient of 0.002 kcal/mol/Å was reached, applying a harmonic potential restraint to the backbone atomic coordinates ( $k = 20$  kcal/mol/Å<sup>2</sup>). Next, we performed an energy minimization

for 20,000 steps, or until an energy gradient of 0.002 kcal/mol/Å was reached, without applying any restraint. After the minimization procedure, the system was equilibrated gradually increasing the temperature to 200 K over 200 ps under constant volume condition (NVT). Finally, the system was progressively heated to 300 K and equilibrated for 100 ps under constant pressure conditions (NPT, 1 atm).

#### *Material and Methods: Detailed Prediction of epitopes: MLCE*

MLCE is a technique based on the analysis of the interaction energies of all the amino acids in a protein. In particular, it computes the non-bonded part of the potential (van der Waals, electrostatic interactions, solvent effects) via a MM/GBSA calculation, obtaining, for a protein composed by  $N$  residues, a  $N \times N$  symmetric interaction matrix  $M_{ij}$ . This matrix can be expressed in terms of its eigenvalues and eigenvectors as

$$M_{ij} = \sum_{\alpha=1}^N \lambda_{\alpha} v_i^{\alpha} v_j^{\alpha}$$

where  $\lambda_{\alpha}$  is the  $\alpha$ -th eigenvalue and  $v_i^{\alpha}$  is the  $i$ -th component of the corresponding eigenvector. The eigenvector with the most negative correspondent eigenvalue contains most of the interaction information for the stabilizing interaction of the system. An approximated interaction matrix  $M \sim_{ij}$  is thus given by

$$M \sim_{ij} = \lambda_1 v_i^1 v_j^1$$

If the structure of the protein is known, one can estimate a contact matrix  $C_{ij}$  by assuming two amino acids in contact if the distance between two of their heavy atoms is smaller than a threshold. The Hadamard product of the two matrices gives us the matrix of the local coupling energies.

$$MCLE_{ij} = M \sim_{ij} \cdot C_{ij}$$

We select as possible interacting zones sets of close by residues that show weak or frustrated interactions.

The analysis of the energetic properties of the surface residues is based on the MLCE method. Basically, we perform a MM/GBSA analysis of the structure in a force field, obtaining a symmetric per-residue interaction matrix  $M_{ij}$  keeping only non-bonded interaction (i.e. electrostatic, van der Waals and solvation contributions). We diagonalize the matrix, obtaining a set of eigenvectors  $x^{(i)}$  sorted following the increasing value of their eigenvalues  $\lambda_i$  where  $N$  is the number of amino acids in the sequence. We thus can write the original matrix  $M_{ij}$  as

$$M_{ij} = \sum_{k=1}^N \lambda_k x^{(k)}(i) x^{(k)}(j)$$

It has been shown that the first eigenvector alone can be used to build an approximate interaction matrix  $M$  :  $M_{ij} = \lambda_1 x^{(1)}(i) x^{(1)}(j)$ , which recapitulates the interactions most relevant for the stabilization of a certain conformation of a defined protein or protein substructure.

The MM/GBSA is performed with Amber 14 software using the ff14SB forcefield.
